# Supplementary material for: Topology on a new facet of bismuth
Source: PubMed Central journal article supplement — Proc Natl Acad Sci U S A. 2019 Jun 13;116(27):13255–9. doi: 10.1073/pnas.1900527116 (PMC6613101; doi:10.1073/pnas.1900527116), 2019-06-13
Supplement: pnas.1900527116.sapp.pdf [file pnas.1900527116.sapp.pdf]

## Supplementary Information for

### Topology on a new facet of bismuth

C.-H. Hsu, X. Zhou, T.-R. Chang, Q. Ma, N. Gedik, A. Bansil, S.-Y. Xu, H. Lin and L. Fu

S.-Y. Xu, H. Lin and L. Fu.

E-mail: [suyangxu@mit.edu](mailto:suyangxu@mit.edu), [nilnish@gmail.com](mailto:nilnish@gmail.com), or [liangfu@mit.edu](mailto:liangfu@mit.edu)

#### This PDF file includes:

Supplementary text

Fig. S1

References for SI reference citations

## Supporting Information Text

### 1. Mirror Chern Number ( $n_{\mathcal{M}}$ )

To determine the topological phase belonging to Bi, the mirror Chern number  $n_{\mathcal{M}}$  of the three mirror planes in Bi is calculated. The  $n_{\mathcal{M}}$  is defined as,

$$n_{\mathcal{M}} = (C_+ - C_-)/2,$$

where  $C_{\pm}$  is the mirror Chern number of each subspace  $\{\pm\}$  carrying opposite mirror eigenvalues  $im$  ( $m = \pm$ ) and is calculated as

$$C_{\pm} = \int \frac{d\mathbf{k}}{(2\pi)} \Omega_{\pm},$$

$$\Omega_{\pm}(\mathbf{k}) = \sum_{n < E_f} \sum_{n \neq m} 2 \text{Im} \frac{\langle \psi_{n\mathbf{k}}^{\pm} | v_x | \psi_{m\mathbf{k}}^{\pm} \rangle \langle \psi_{m\mathbf{k}}^{\pm} | v_y | \psi_{n\mathbf{k}}^{\pm} \rangle}{(E_{m\mathbf{k}} - E_{n\mathbf{k}})^2}.$$

The integration is carried in the 2D  $\mathbf{k}$  space where states ( $\psi_{n\mathbf{k}}$ ) are invariant with respect to the mirror symmetry  $\mathcal{M}$ . In the above equation,  $E_{m\mathbf{k}}$  is the eigenenergy of band  $m$ , and  $v_{x,y}$  is the velocity operator. Our calculation shows that  $n_{\mathcal{M}} = 0$  in Bi.

### 2. Wannier Charge Center (WCC)

The Wannier charge center (WCC) has been shown to be a useful way to analyze whether the surface states are protected by the bulk topology (1–7). Essentially, WCC is the position of the Wannier state in the unit cell and has been widely used in the modern theory of polarization for calculating bulk polarization (8–11). The WCC can be calculated by solving the eigenvalue of position operator  $P\hat{x}P = Pe^{-i\delta k_x \hat{x}}P$  projected on the Bloch states (1, 12), where  $P$  is the projection operator. By adopting the periodic gauge,

$$|u_{\mathbf{k}+\mathbf{G}}\rangle = e^{-i\mathbf{G}\cdot\mathbf{r}}|u_{\mathbf{k}}\rangle, \quad [1]$$

where  $|u_{\mathbf{k}}\rangle$  is the periodic part of the Bloch wavefunction at  $\mathbf{k}$ , and  $\mathbf{G}$  is the reciprocal vector, the eigenvalue ( $\bar{x}$ ) of  $P\hat{x}P$  has been shown to being equal to the non-Abelian Berry phase of  $\langle u_{\mathbf{k}_{\perp}+\mathbf{G}_x} | u_{\mathbf{k}_{\perp}} \rangle$  (1) in the parallel transport,

$$\bar{x} = -\frac{1}{2\pi} \text{Im} \log \left( \langle u_{\mathbf{k}_{\perp}+\mathbf{G}_x} | \prod_{k_x=\delta k_x}^{G_x-\delta k_x} P(k_x) | u_{\mathbf{k}_{\perp}} \rangle \right) \quad [2]$$

where  $\mathbf{k}_{\perp}$  is the  $k$  vector normal to  $k_x$  and  $P(k_x) = |u_{\mathbf{k}_{\perp}+k_x}\rangle \langle u_{\mathbf{k}_{\perp}+k_x}|$ .

We then applied eq. 2 to calculate the WCC of the surface Brillouin zone (SBZ) of Bi (1 $\bar{1}0$ ) and (111) surfaces. For the (1 $\bar{1}0$ ) surface, where [1 $\bar{1}0$ ] ||  $\hat{x}$ , the SBZ ( $\mathbf{k}_{\perp}$ ) is spanned on the  $k_y - k_z$  plane. The calculated WCCs ( $\bar{x}$ ) along high symmetry  $\mathbf{k}_{\perp}$  path is shown in Figure. S1(a), where the high symmetry  $k$  points are expressed in the unit of  $(\frac{2\pi}{b}, \frac{2\pi}{c})$ . Two dominant WCC sheets (A and B indicated in Figure. S1(a)) are found in a unit cell, and are well separated along the high symmetry  $\mathbf{k}_{\perp}$  paths. However, this can not rule out the  $C_{2[1\bar{1}0]}$  protected TCI phase, since the  $C_{2[1\bar{1}0]}$  protected surface states on (1 $\bar{1}0$ ) can locate at a generic  $\mathbf{k}_{\perp}$ . By scanning the full SBZ, we found the connection between WCC sheet A and B (see Figure. 2(g)(h) in the main text) and confirm the  $C_{2[1\bar{1}0]}$  protected topology.

We also studied the WCCs on the (111) surface, and the result is shown in Figure. S1(b-d). On the (111) surface, where [111] ||  $\hat{z}$ , the SBZ ( $\mathbf{k}_{\perp}$ ) is spanned by  $k_x$  and  $k_y$ . The results show that the WCC sheets are fully disconnected. Moreover, the calculated WCCs at the unit cell boundary,  $\bar{z} = 1$  (Figure. S1(b)), almost reproduces the property of surface states calculated in a semi-infinite (111) surface (see Figure. 4(d)). This result reconfirms that  $n_{\mathcal{M}} = 0$ .

## References

1. Yu R, Qi XL, Bernevig A, Fang Z, Dai X (2011) Equivalent expression of  $\mathbb{Z}_2$  topological invariant for band insulators using the non-Abelian Berry connection. *Physical Review B* 84(7):075119.
2. Fidkowski L, Jackson TS, Klich I (2011) Model Characterization of Gapless Edge Modes of Topological Insulators Using Intermediate Brillouin-Zone Functions. *Physical Review Letters* 107(3):036601.
3. Taherinejad M, Garrity KF, Vanderbilt D (2014) Wannier center sheets in topological insulators. *Physical Review B* 89(11):115102.
4. Alexandradinata A, Dai X, Bernevig BA (2014) Wilson-loop characterization of inversion-symmetric topological insulators. *Physical Review B* 89(15):155114.
5. Alexandradinata A, Wang Z, Bernevig BA (2016) Topological Insulators from Group Cohomology. *Physical Review X* 6(2):021008.
6. Benalcazar WA, Bernevig BA, Hughes TL (2017) Quantized electric multipole insulators. *Science* 357(6346):61–66.
7. Wieder BJ, et al. (2018) Wallpaper fermions and the nonsymmorphic Dirac insulator. *Science* 361(6399):246–251.
8. King-Smith RD, Vanderbilt D (1993) Theory of polarization of crystalline solids. *Physical Review B* 47(3):1651–1654.
9. Resta R (1994) Macroscopic polarization in crystalline dielectrics: The geometric phase approach. *Reviews of Modern Physics* 66(3):899–915.

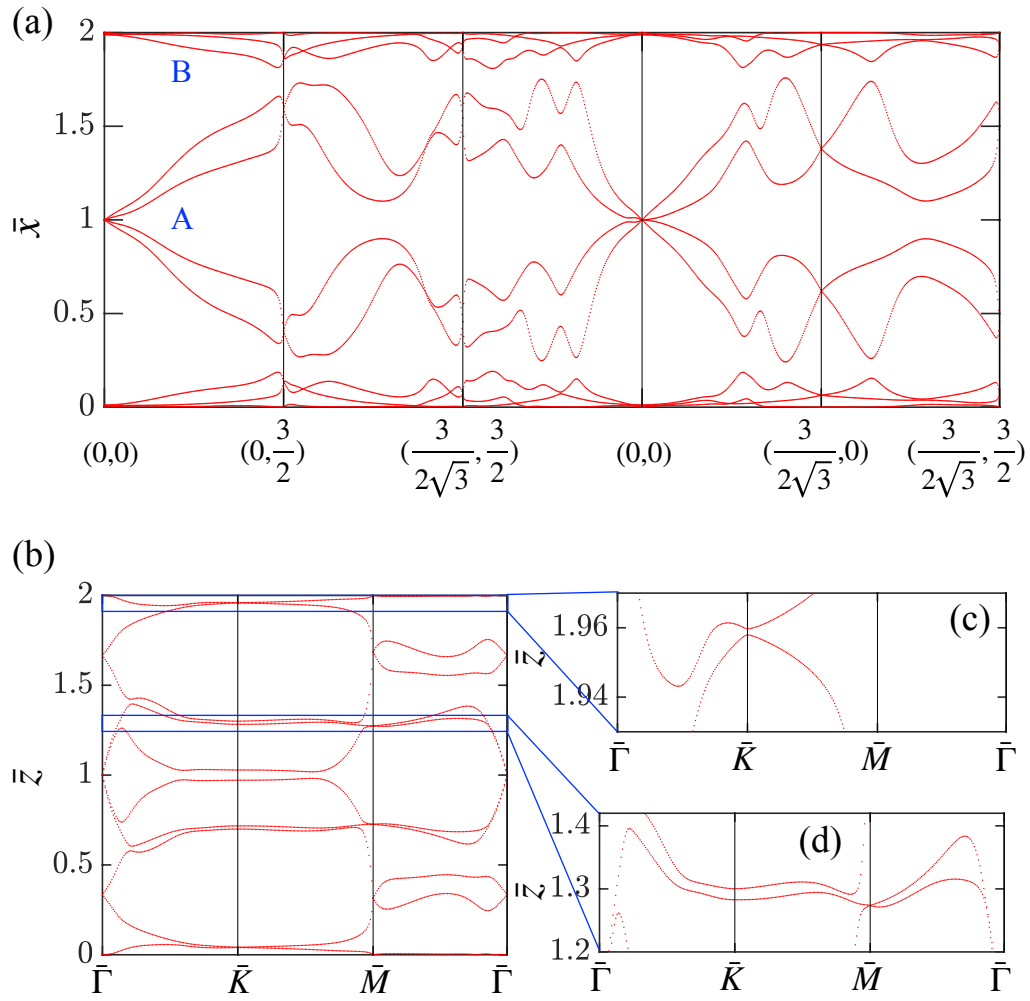

**Fig. S1.** (a) WCCs of  $\bar{x}(k_y, k_z)$  on  $(\bar{1}\bar{1}0)$  surface along high symmetry  $k$  paths. (b) WCCs of  $\bar{z}(k_x, k_y)$  on  $(111)$  surface along the  $k$  paths with the  $k$  points indicated in the main text. (c,d) The zoomed-in WCCs of (b) show the fully disconnected characteristic of WCC sheets.

10. Wu X, Diéguez O, Rabe KM, Vanderbilt D (2006) Wannier-Based Definition of Layer Polarizations in Perovskite Superlattices. *Physical Review Letters* 97(10):107602.
11. Coh S, Vanderbilt D (2009) Electric Polarization in a Chern Insulator. *Physical Review Letters* 102(10):107603.
12. Resta R (2000) Manifestations of Berry's phase in molecules and condensed matter. *Journal of Physics: Condensed Matter* 12(9):R107–R143.
